# Supplementary material for: Novel approach for a high-energy-density Li–air battery: tri-dimensional growth of Li2O2 crystals tailored by electrolyte Li+ ion concentrations
Source: Royal Society of Chemistry journal article supplement (doi:10.1039/c4ta00834k), 2014-01-01

## Supporting Information for

# Novel approach for high-energy-density Li-air battery: tri-dimensional growth of $\text{Li}_2\text{O}_2$ crystals tailored by $\text{Li}^+$ ion concentrations

Yang Liu,<sup>a</sup> Liumin Suo,<sup>b</sup> Huan Lin,<sup>a</sup> Wenchao Yang,<sup>a</sup> Yanqun Fang,<sup>a</sup>  
Xianjun Liu,<sup>a</sup> Deyu Wang,<sup>\*a</sup> Yong-Sheng Hu,<sup>\*b</sup> Weiqiang Han,<sup>a</sup> Liqun  
Chen,<sup>b</sup>

<sup>a</sup>Ningbo Institute of Material Technology and Engineering, Chinese Academy of Science,  
509 Zhuangshi Road, Zhenhai, Ningbo 315201, China. E-mail: wangdy@nimte.ac.cn

<sup>b</sup>National Laboratory for Condensed Matter Physics, Institute of Physics, Chinese  
Academy of Sciences, Beijing 100190, China. E-mail: yshu@aphy.iphy.ac.cn

### Contents

1. Table S1 Discharge capacities and average granule diameters at the end of discharge processes
2. Table S2 The parameters of the discharge product morphology at controlled discharge capacities
3. Figure S1 Home-made Li-air test system
4. Figure S2 Full size SEM images of the cathode surfaces before and after discharge
5. Figure S3 Full size SEM images of the cathode surfaces at controlled discharge capacities
6. Figure S4 Discharge curve of Li-air cells with nickel foam only and KB loaded
7. Figure S5 XRD patterns of the discharge products at the end of discharging progress
8. Figure S6 FTIR patterns of the discharge products.

**Table S1.** Average granule diameters and discharge capacities in electrolytes with the concentration of LiTFSI in TEGDME varied from  $10^{-3}$  M to 5 M.

| Li <sup>+</sup> (mol L <sup>-1</sup> )                       | $10^{-3}$ | $10^{-2}$ | $10^{-1}$ | 1     | 2      | 3      | 4     | 5     |
|--------------------------------------------------------------|-----------|-----------|-----------|-------|--------|--------|-------|-------|
| Average granule diameter (nm)                                | 86.3      | 139.2     | 394.4     | 549.9 | 5417.7 | 5824.8 | 111.3 | 414.4 |
| Discharge capacity (mA h g <sub>carbon</sub> <sup>-1</sup> ) | 2211      | 3013      | 6055      | 7529  | 12250  | 13245  | 2461  | 3967  |

**Table S2.** Average granule diameters and thicknesses of product belts of the cathodes obtained at controlled discharge capacities in electrolytes with 3 M Li<sup>+</sup> ion.

| Discharge capacity (mA h g <sub>carbon</sub> <sup>-1</sup> ) | 0    | 3000 | 5000  | 7000  | 9000   | 13245  |
|--------------------------------------------------------------|------|------|-------|-------|--------|--------|
| Average granule diameter (nm)                                | 63.9 | 85.1 | 394.8 | 549.7 | 5417.5 | 5824.8 |
| Average thickness of product belt (nm)                       |      |      |       | 32.6  | 48.2   | 79.6   |

**Figure S1.** Home-made Li-air test system, based on Etelux glove box, filled with  $N_2+O_2$  (78:22, v/v) and humidity is controlled less than 1 ppm.

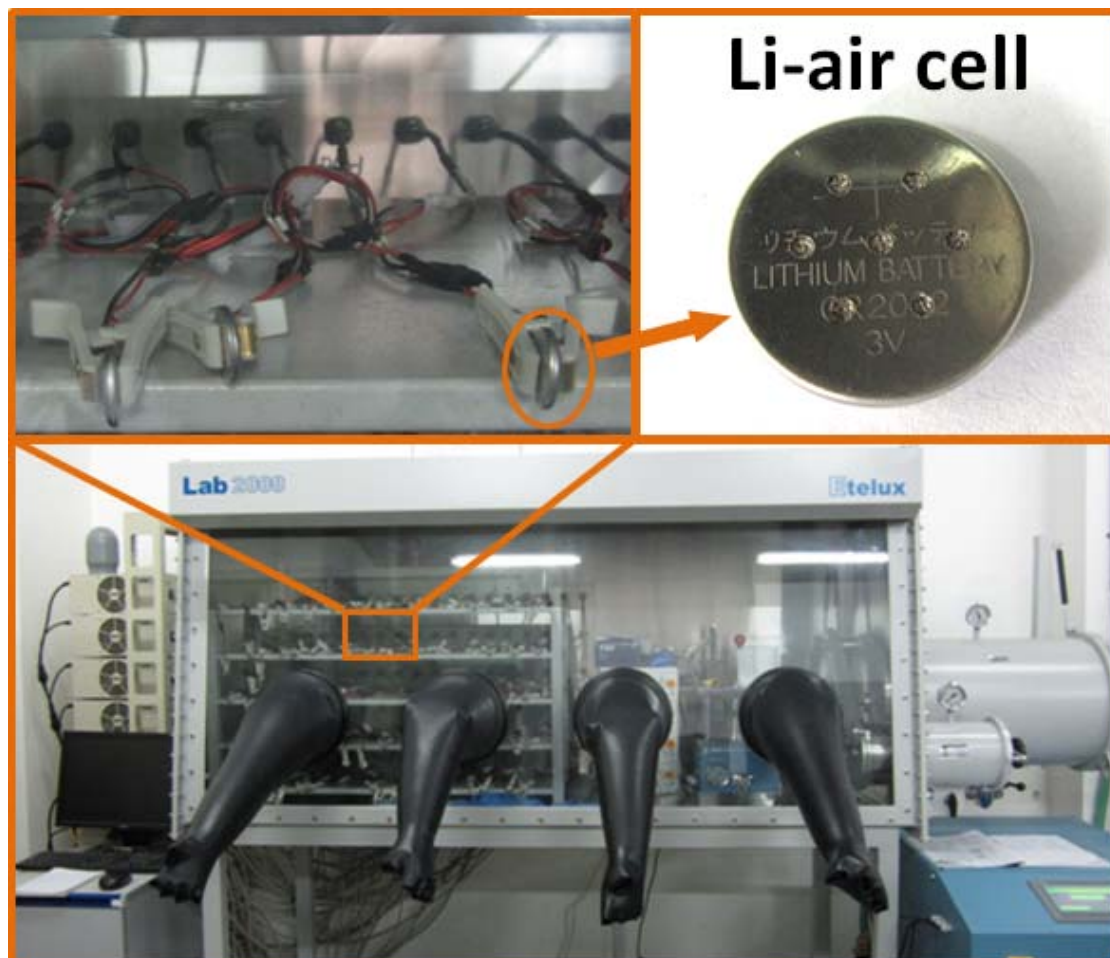

**Figure S2.** Full size SEM images of the cathode surfaces before and after discharge.

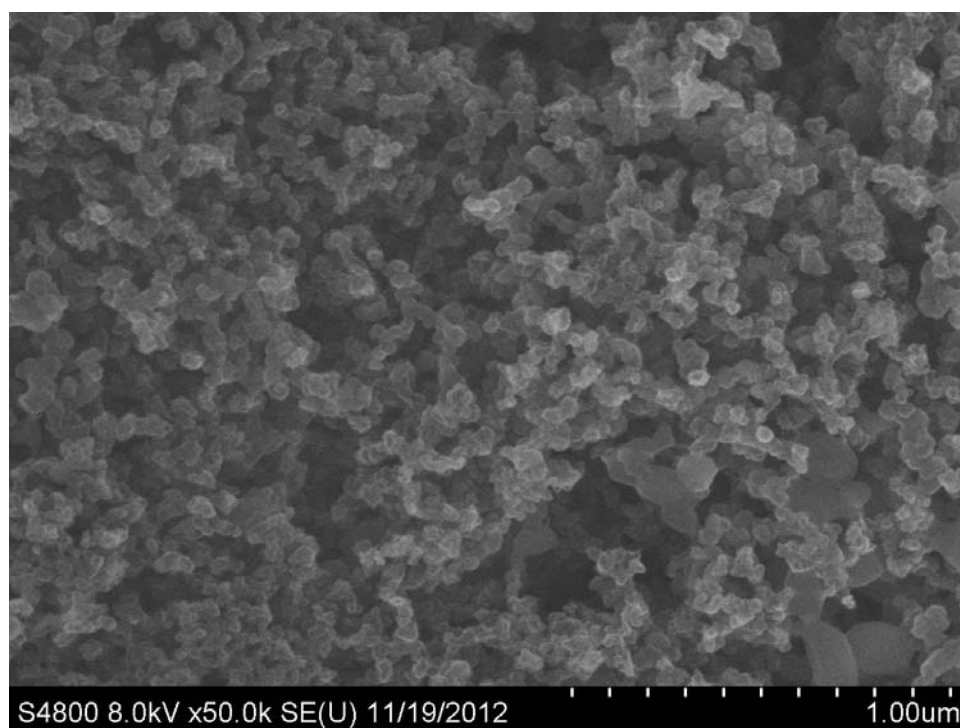

a) Full size SEM image of pristine cathode surface.

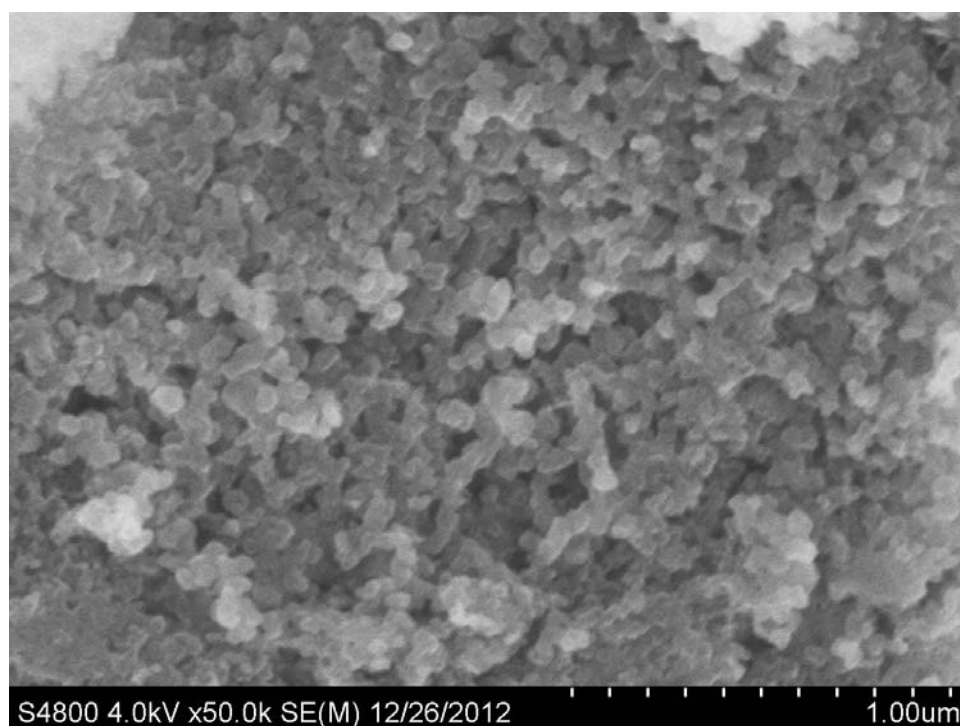

b) Full size SEM image of the cathode surface after discharge in the  $10^{-3}$  M electrolyte.

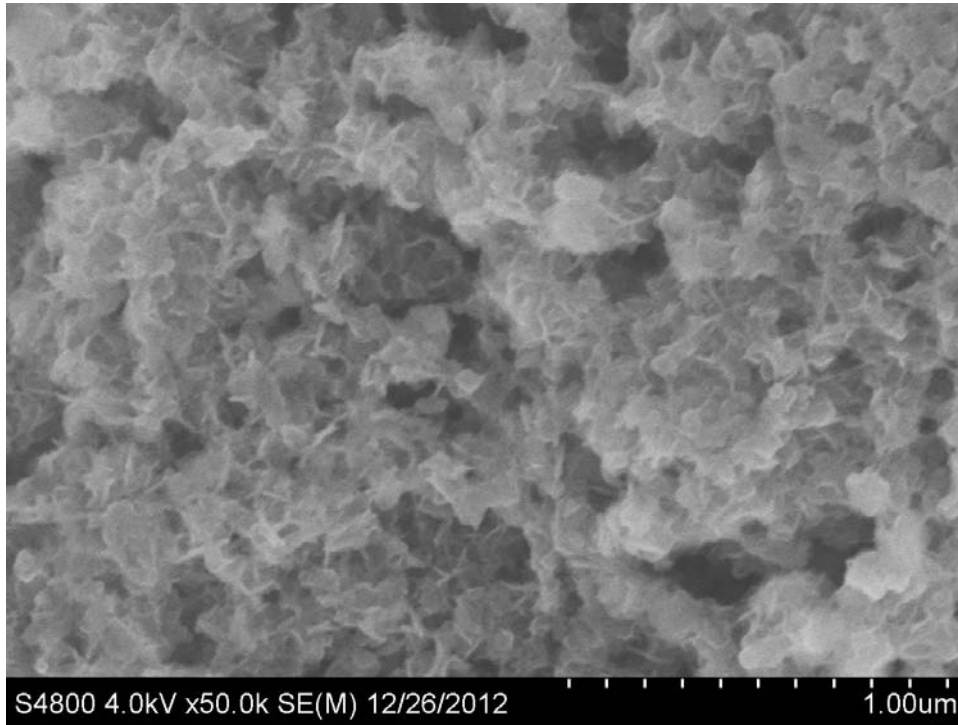

c) Full size SEM image of the cathode surface after discharge in the  $10^{-2}$  M electrolyte.

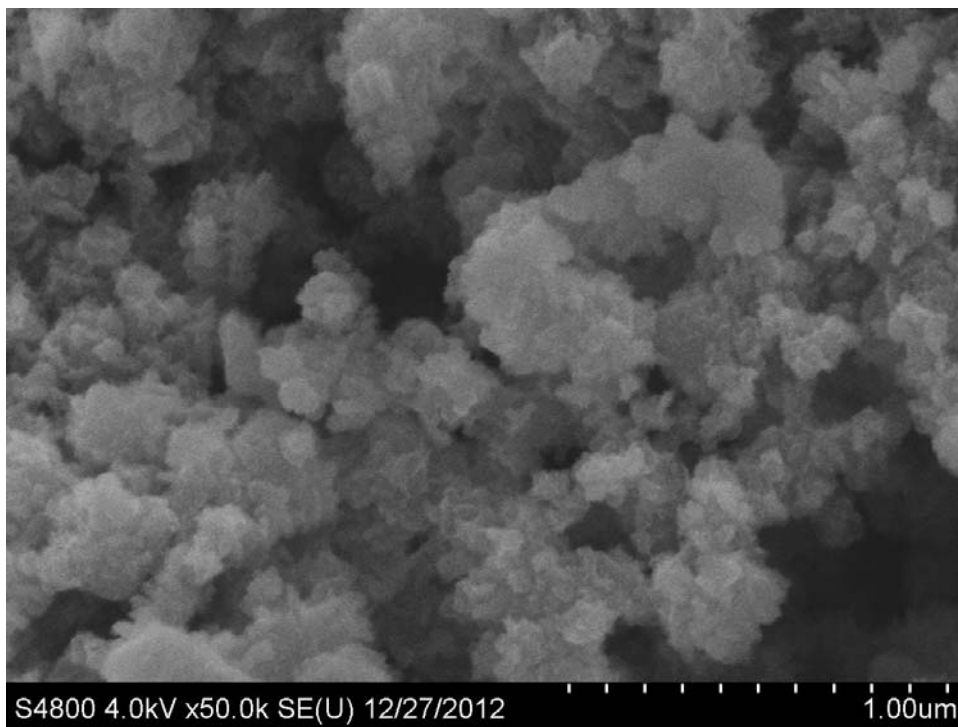

d) Full size SEM image of the cathode surface after discharge in the  $10^{-1}$  M electrolyte.

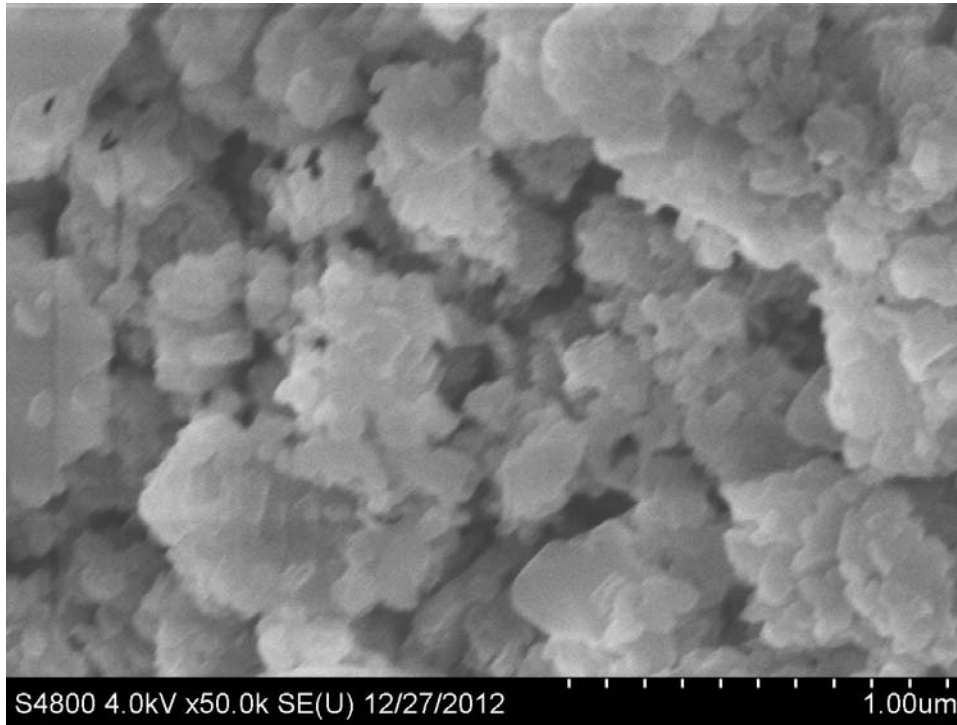

e) Full size SEM image of the cathode surface after discharge in the 1 M electrolyte.

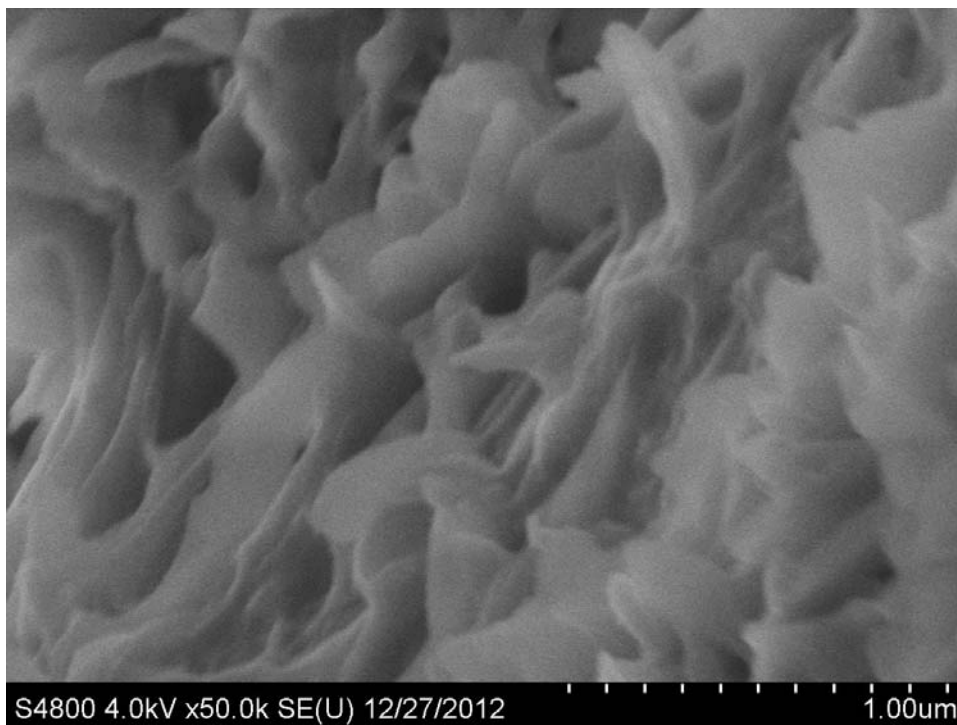

f) Full size SEM image1 of the cathode surface after discharge in the 2 M electrolyte.

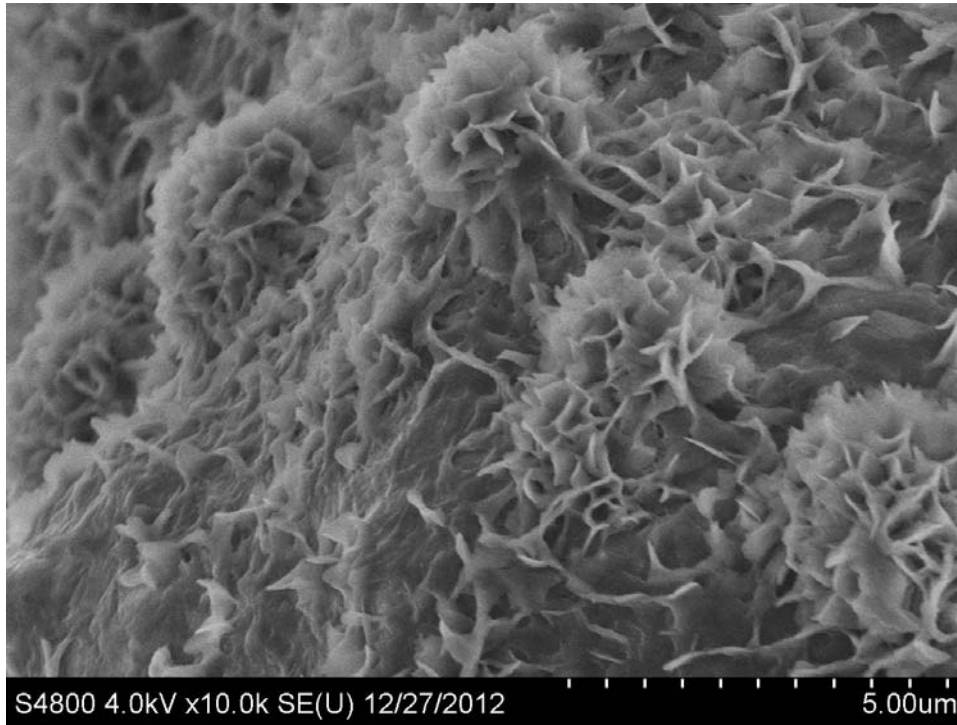

g) Full size SEM image2 of the cathode surface after discharge in the 2 M electrolyte.

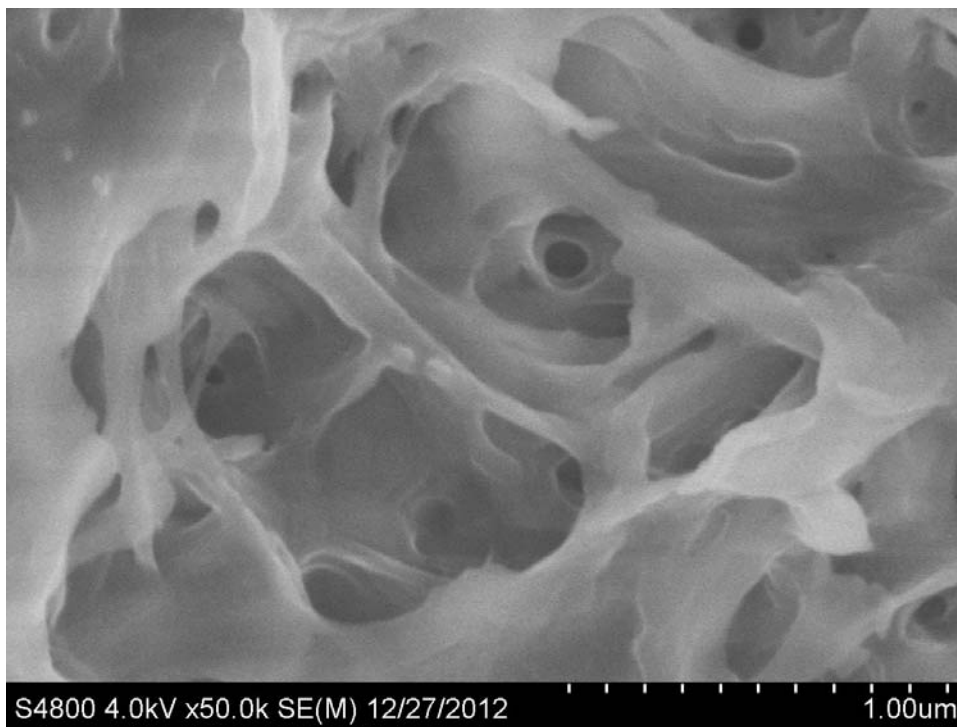

h) Full size SEM image1 of the cathode surface after discharge in the 3 M electrolyte.

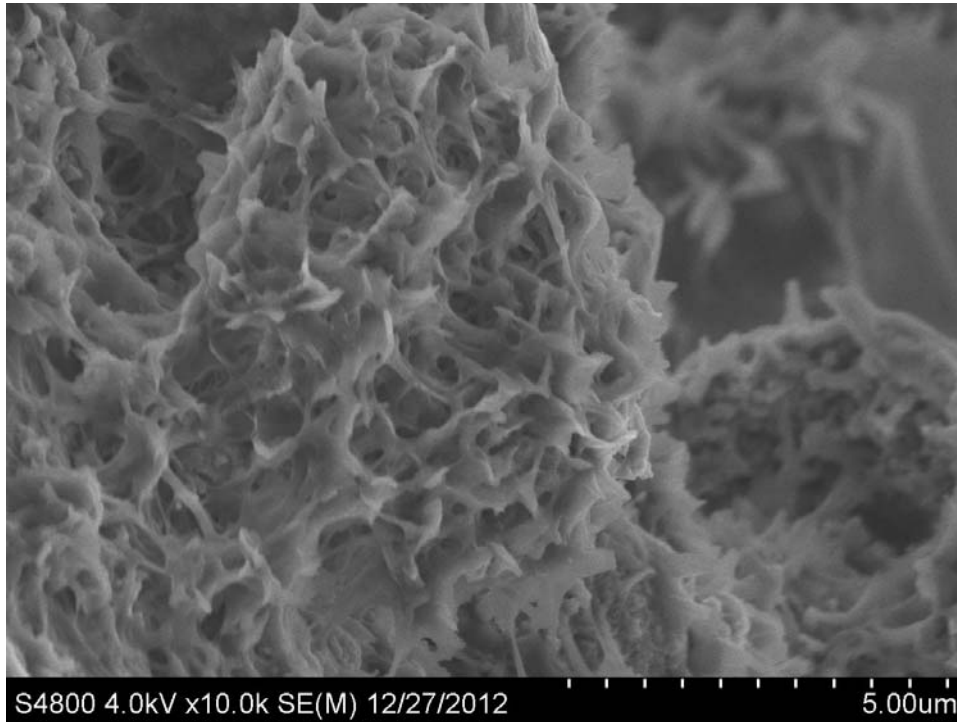

i) Full size SEM image2 of the cathode surface after discharge in the 3 M electrolyte.

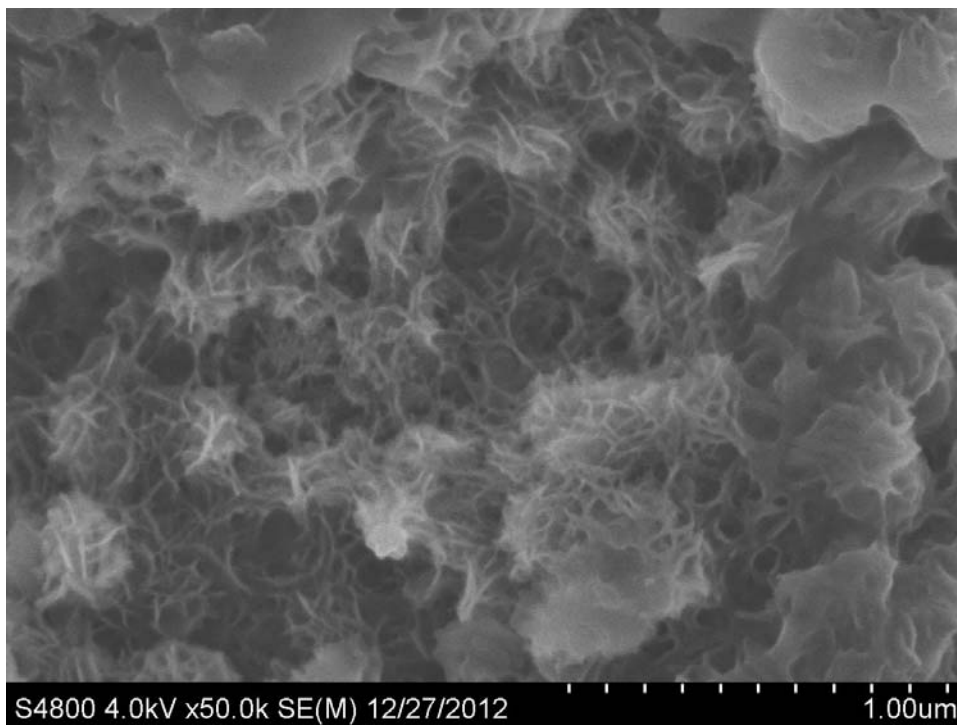

j) Full size SEM image of the cathode surface after discharge in the 4 M electrolyte.



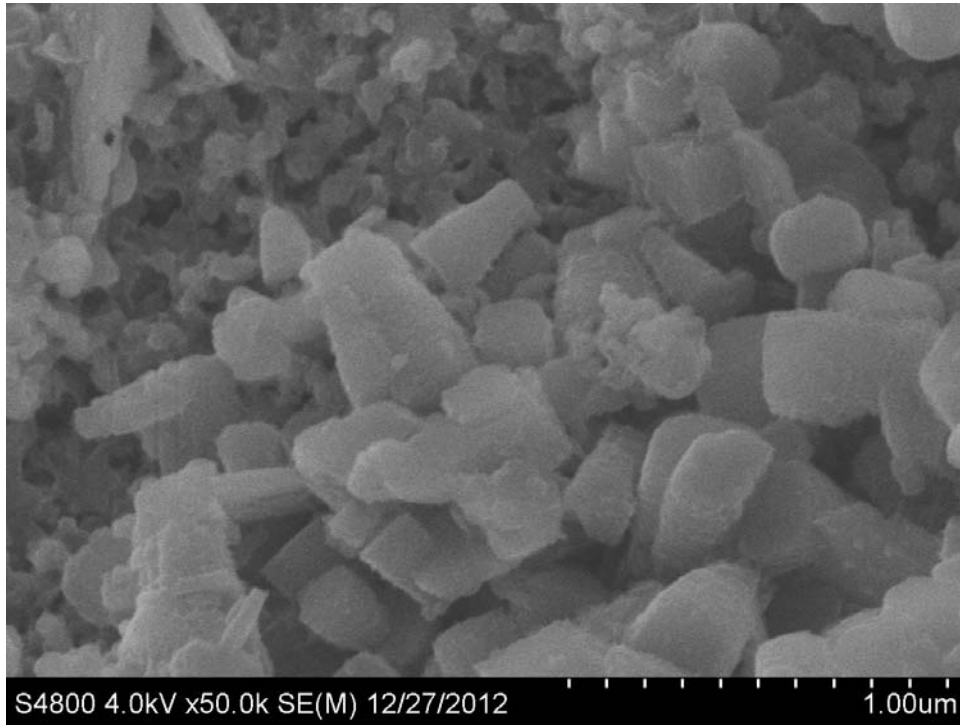

k) Full size SEM image of the cathode surface after discharge in the 5 M electrolyte.

**Figure S3.** Full size SEM images of the cathode surfaces at controlled discharge capacities in 3 M electrolyte.

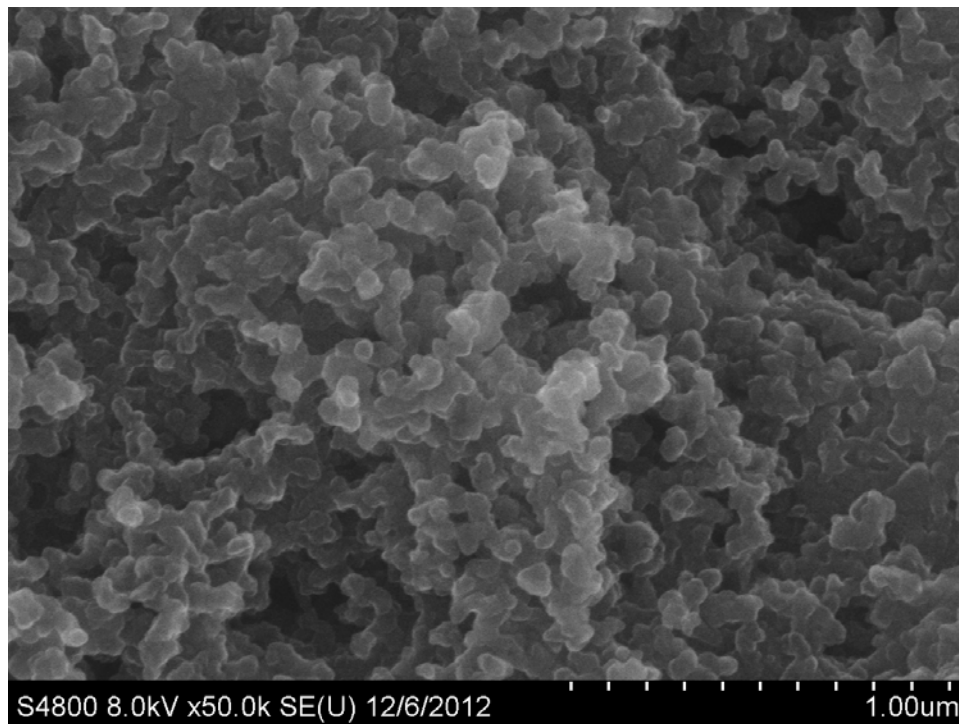

a) Full size SEM image of the cathode surface in 3000 mA h g<sub>carbon</sub><sup>-1</sup>.

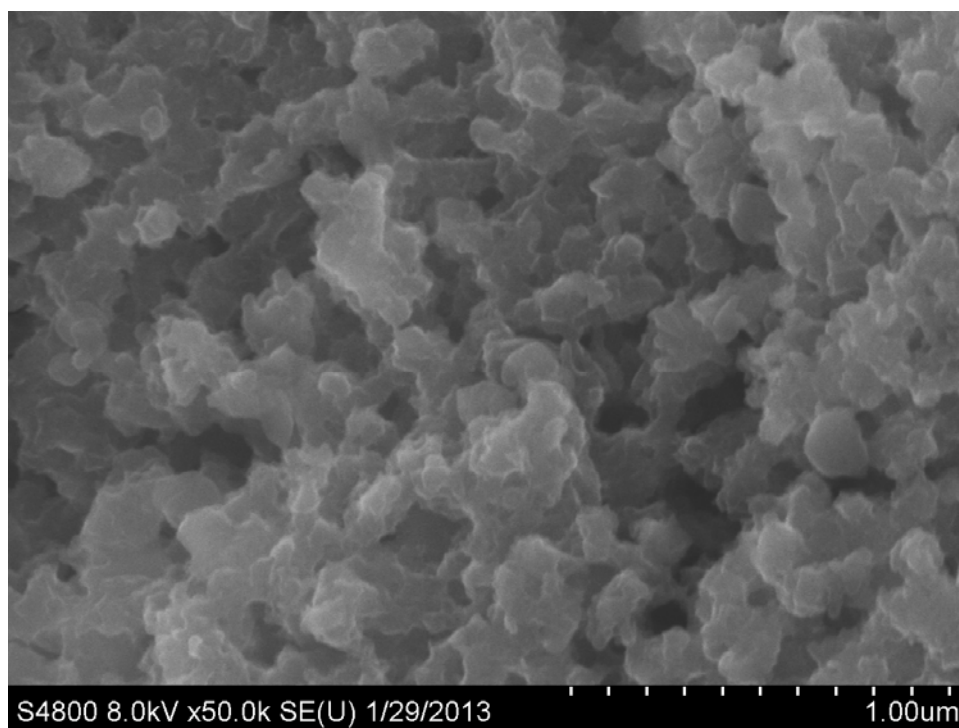

b) Full size SEM image of the cathode surface in 5000 mA h g<sub>carbon</sub><sup>-1</sup>.

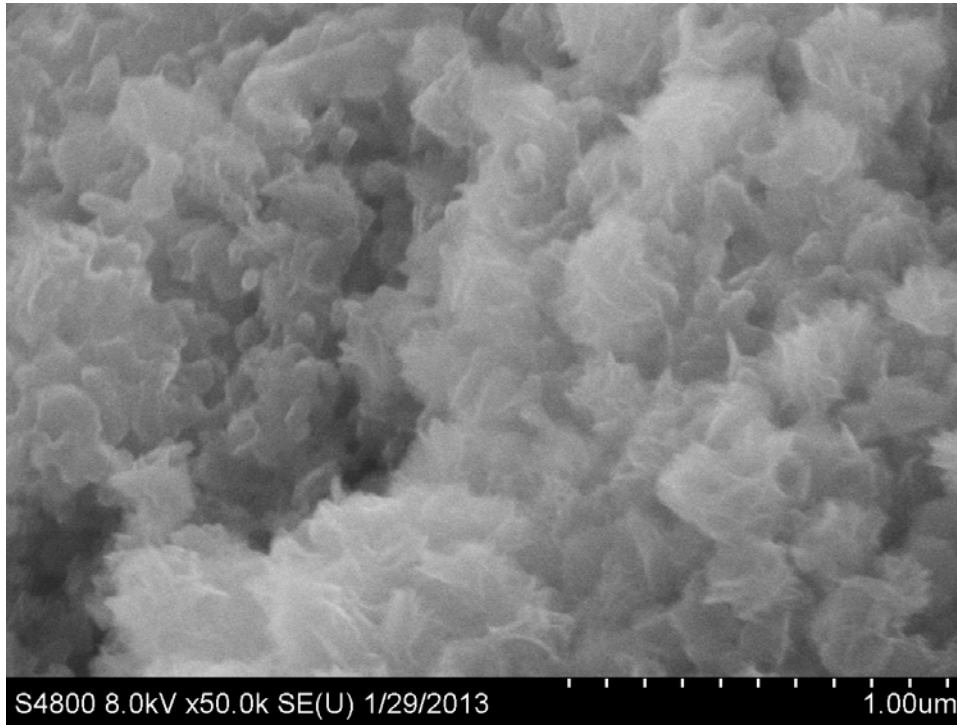

c) Full size SEM image of the cathode surface in 7000 mA h g<sub>carbon</sub><sup>-1</sup>.

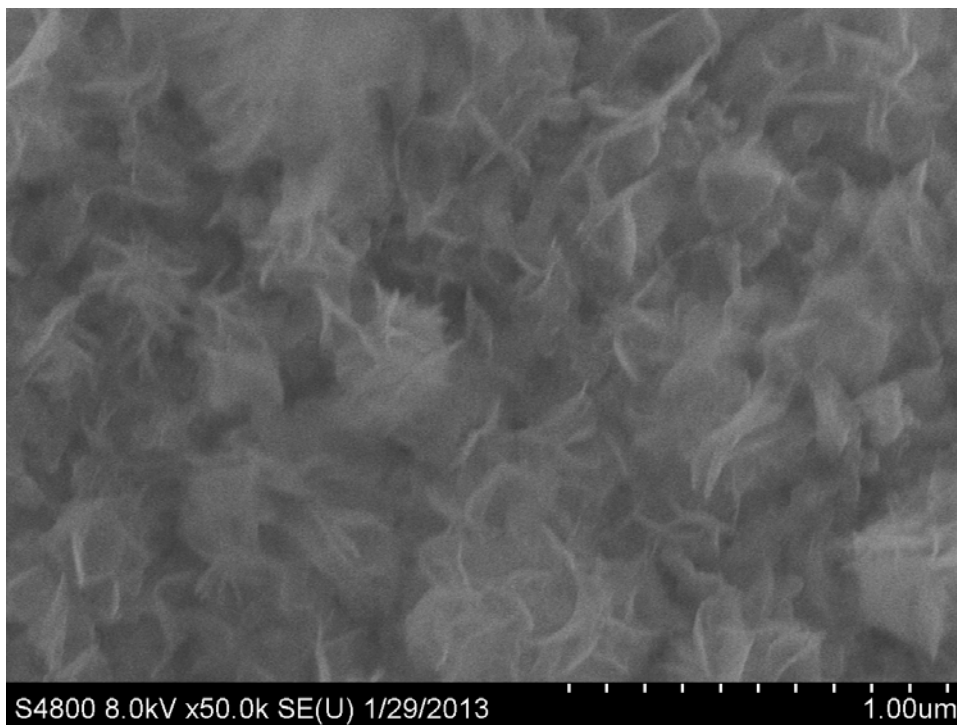

d) Full size SEM image of the cathode surface in 9000 mA h g<sub>carbon</sub><sup>-1</sup>.

**Figure S4.** Discharge curves of Li-air batteries with bare nickel foam and air electrode in 1 M LiTFSI in TEGDME under  $0.25 \mu\text{A cm}^{-2}$  with a cut-off potential of 2.0 V vs.  $\text{Li/Li}^+$ . The contribution of current collector is negligible to total discharge capacity of the electrode.

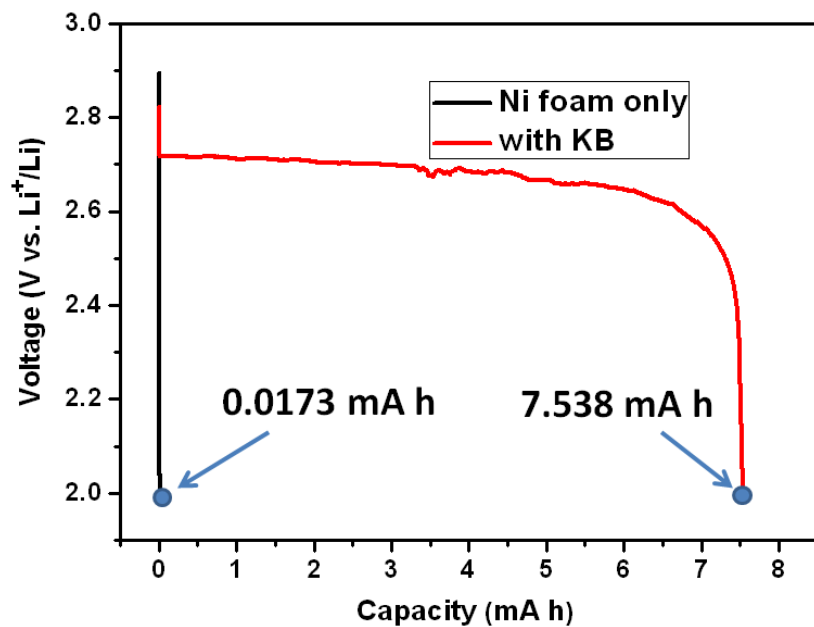

**Figure S5.** XRD patterns of the discharged air-cathodes tested at the end of discharging progress. The strong peaks could be attributed to Ni and  $\text{Li}_2\text{O}_2$ , and the peaks of  $\text{LiCO}_3$ ,  $\text{LiOH}$ , or  $\text{Li-O-R}$  can't be observed.

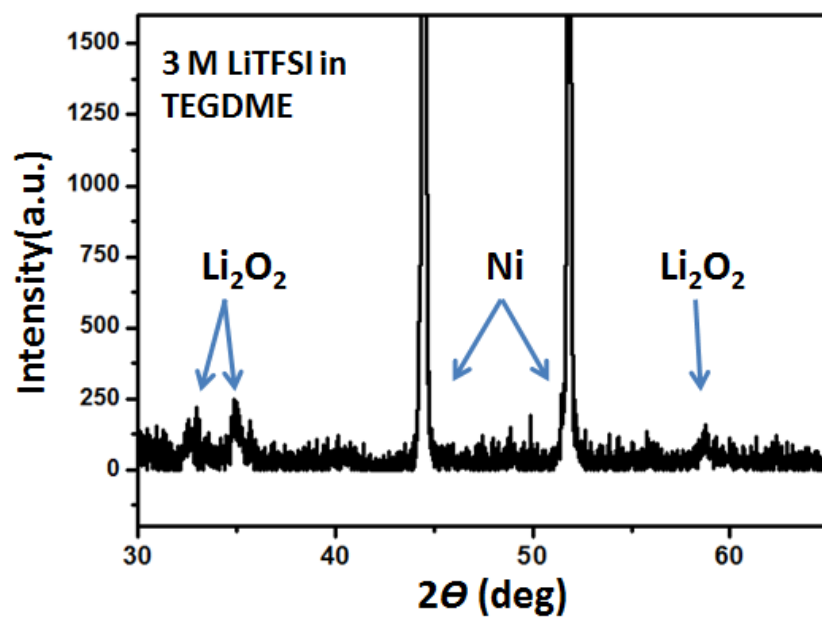

Figure S6. FTIR patterns of the discharge products in the 3M electrolyte.

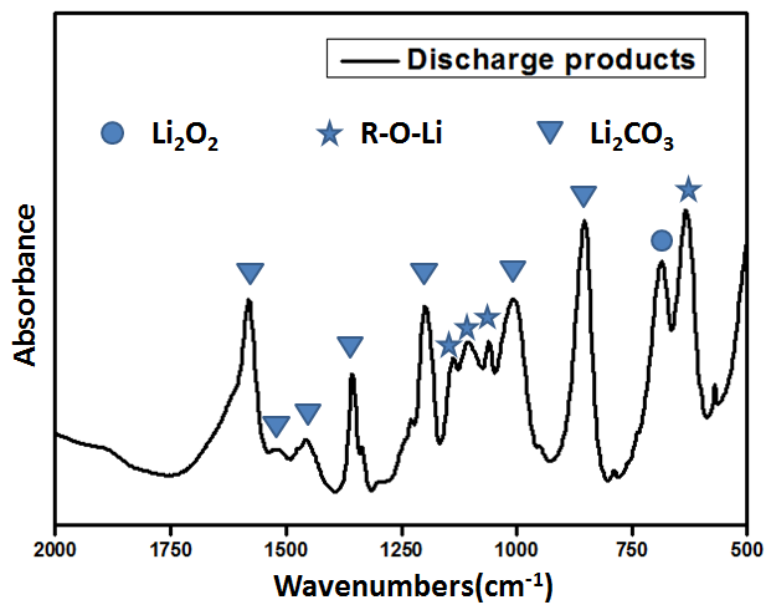

Supplement: c4ta00834k1.pdf [file c4ta00834k1.pdf]
